# Supplementary material for: A novel strategy for nephritis-associated infections: dual-antibacterial/anti-inflammatory effects of Schiff base
Source: Royal Society of Chemistry journal article supplement (doi:10.1039/d5ra05377c), 2025-01-01
Supplement: d5ra05377c1.pdf [file d5ra05377c1.pdf]

## **A Novel Strategy for Nephritis-Associated Infections: Dual-Antibacterial/Anti-Inflammatory Effects of Schiff Base**

Yu Zhang <sup>1\*</sup>, WeiWei Fu <sup>1</sup>, XiangLi Xue <sup>1</sup>

<sup>1</sup>*The Second Hospital of Qinhuangdao , Qinhuangdao, China, 066000*

---

\*Correspondent. E-mail: 19316050110@163.com

## Table of Contents

|                                                          |    |
|----------------------------------------------------------|----|
| <i><sup>1</sup>H and <sup>13</sup>C NMR of D1</i> .....  | 1  |
| <i><sup>1</sup>H and <sup>13</sup>C NMR of D2</i> .....  | 2  |
| <i><sup>1</sup>H and <sup>13</sup>C NMR of D3</i> .....  | 3  |
| <i><sup>1</sup>H and <sup>13</sup>C NMR of D4</i> .....  | 4  |
| <i><sup>1</sup>H and <sup>13</sup>C NMR of D5</i> .....  | 5  |
| <i>HPLC chromatogram and mass spectrum of D5</i> .....   | 6  |
| <i><sup>1</sup>H and <sup>13</sup>C NMR of D6</i> .....  | 7  |
| <i><sup>1</sup>H and <sup>13</sup>C NMR of D7</i> .....  | 8  |
| <i><sup>1</sup>H and <sup>13</sup>C NMR of D8</i> .....  | 9  |
| <i><sup>1</sup>H and <sup>13</sup>C NMR of D9</i> .....  | 10 |
| <i><sup>1</sup>H and <sup>13</sup>C NMR of D10</i> ..... | 11 |

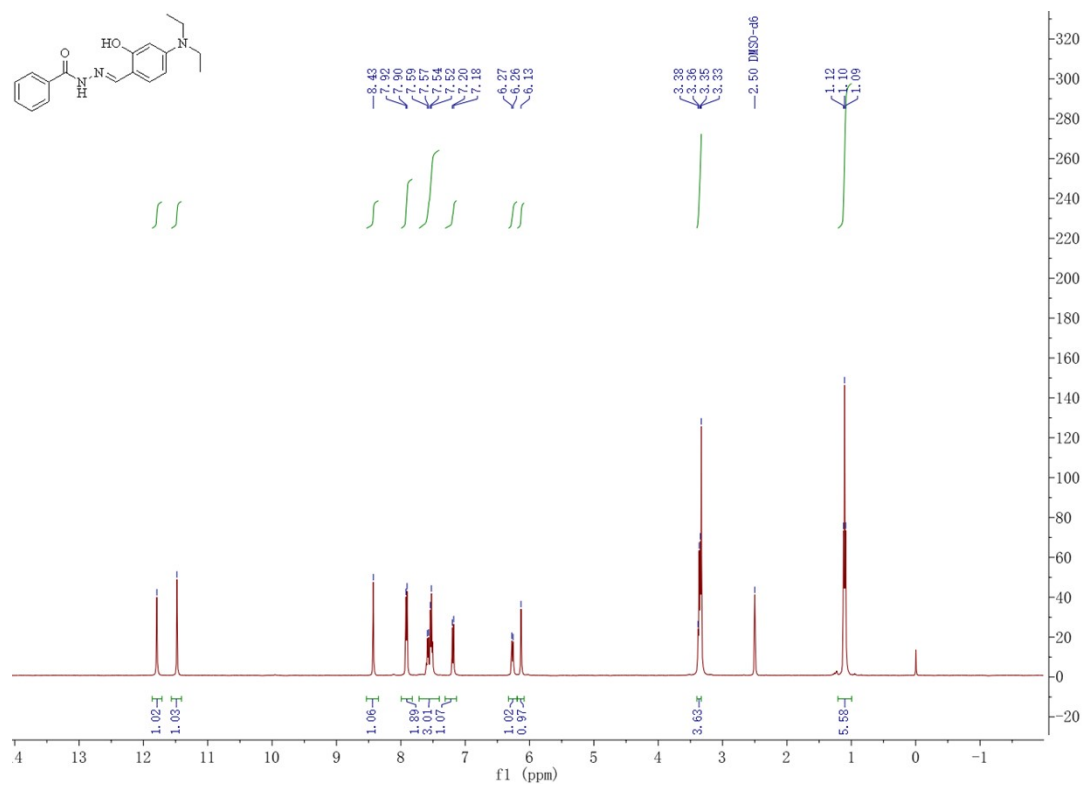

Fig. <sup>1</sup>H NMR of **D1** (400 MHz, DMSO)

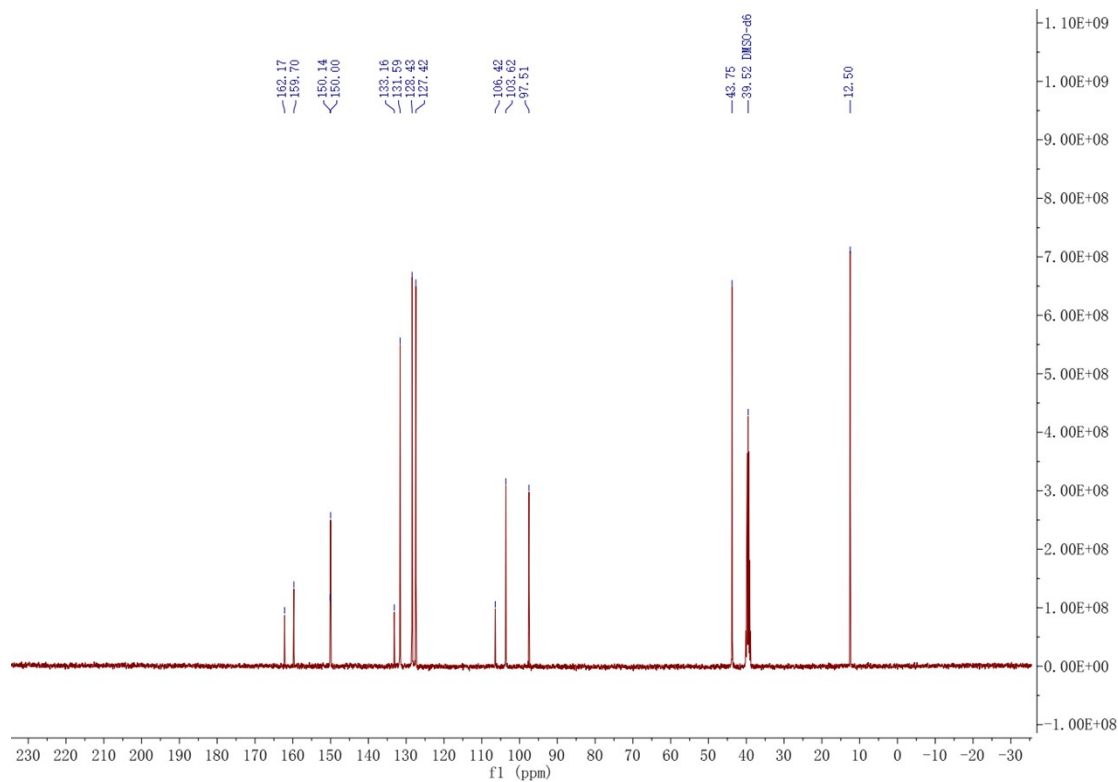

Fig. <sup>13</sup>C NMR of **D1** (100 MHz, DMSO)

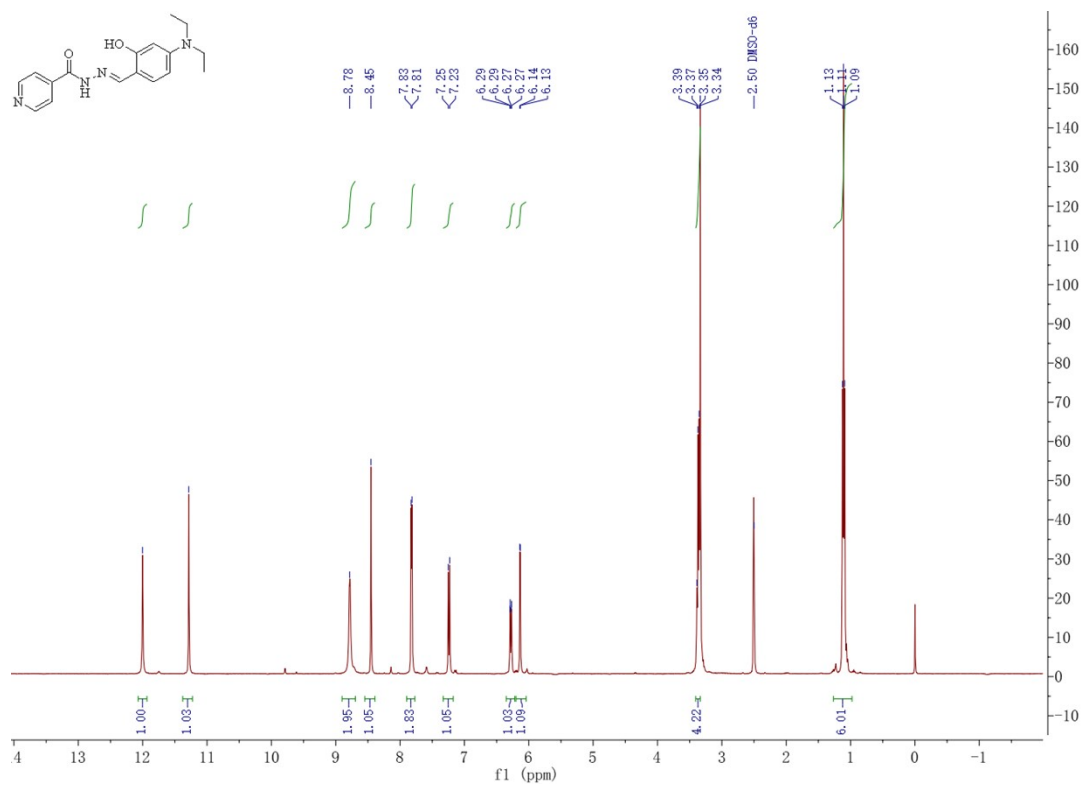

Fig. <sup>1</sup>H NMR of D2 (400 MHz, DMSO)

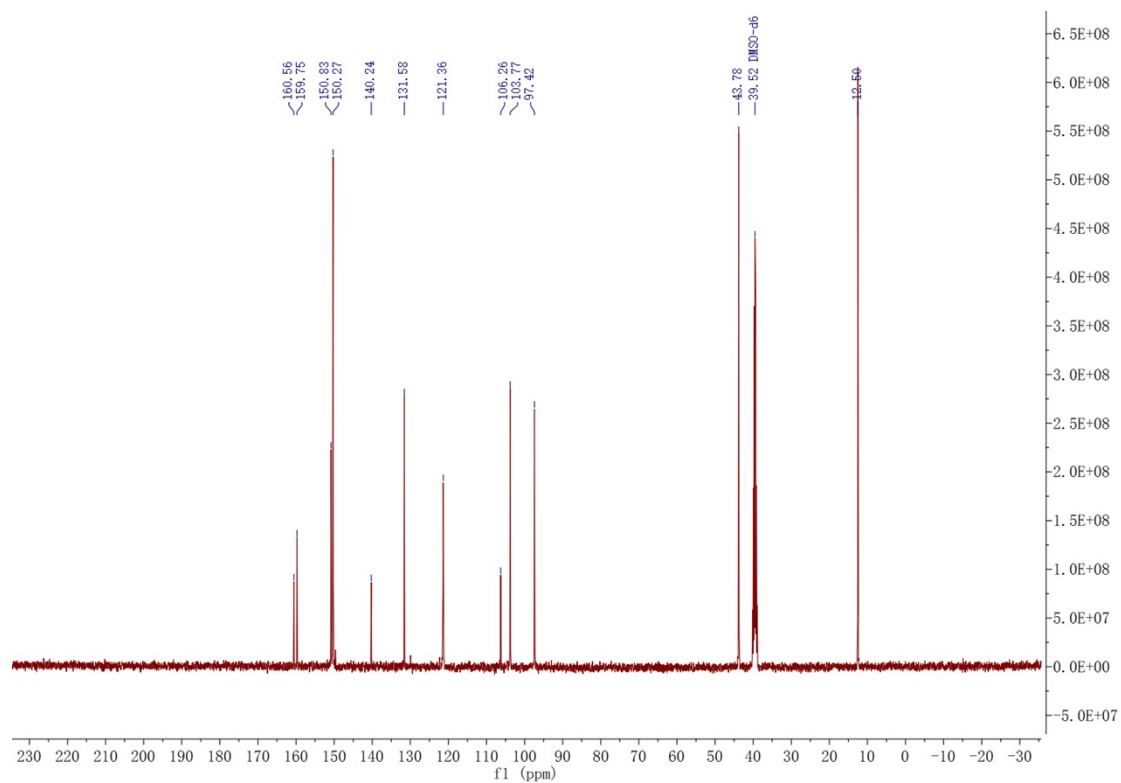

Fig. <sup>13</sup>C NMR of D2 (100 MHz, DMSO)

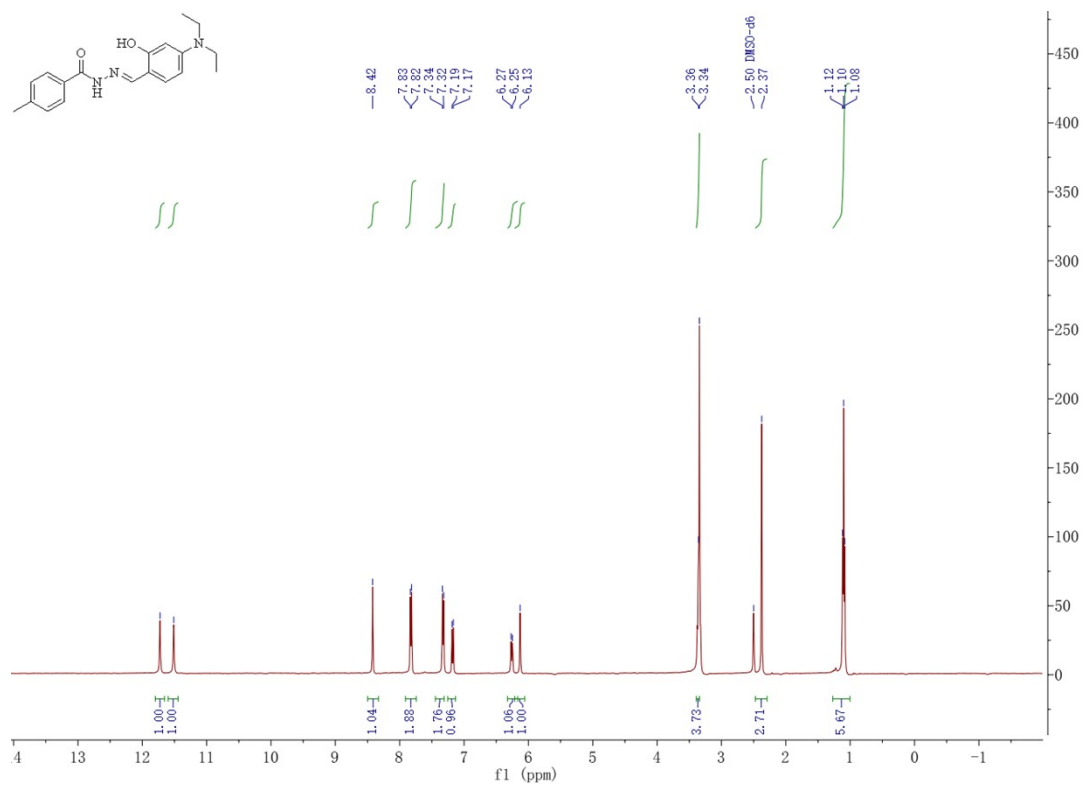

Fig. <sup>1</sup>H NMR of D3 (400 MHz, DMSO)

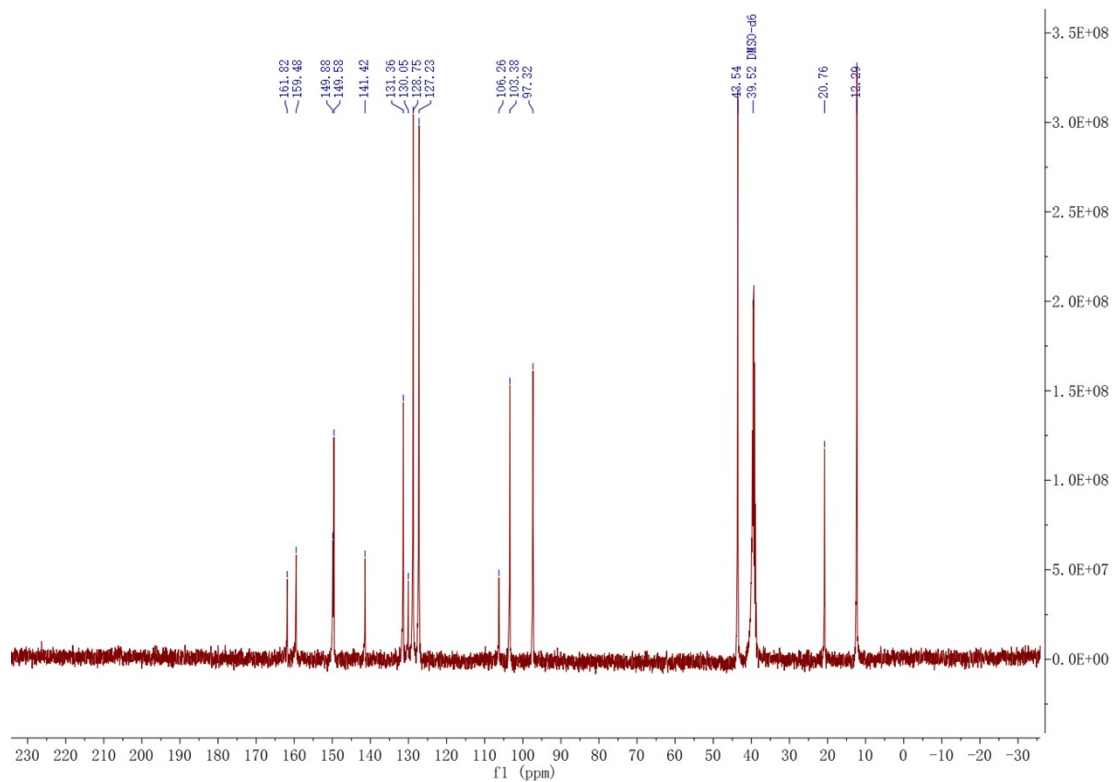

Fig. <sup>13</sup>C NMR of D3 (100 MHz, DMSO)

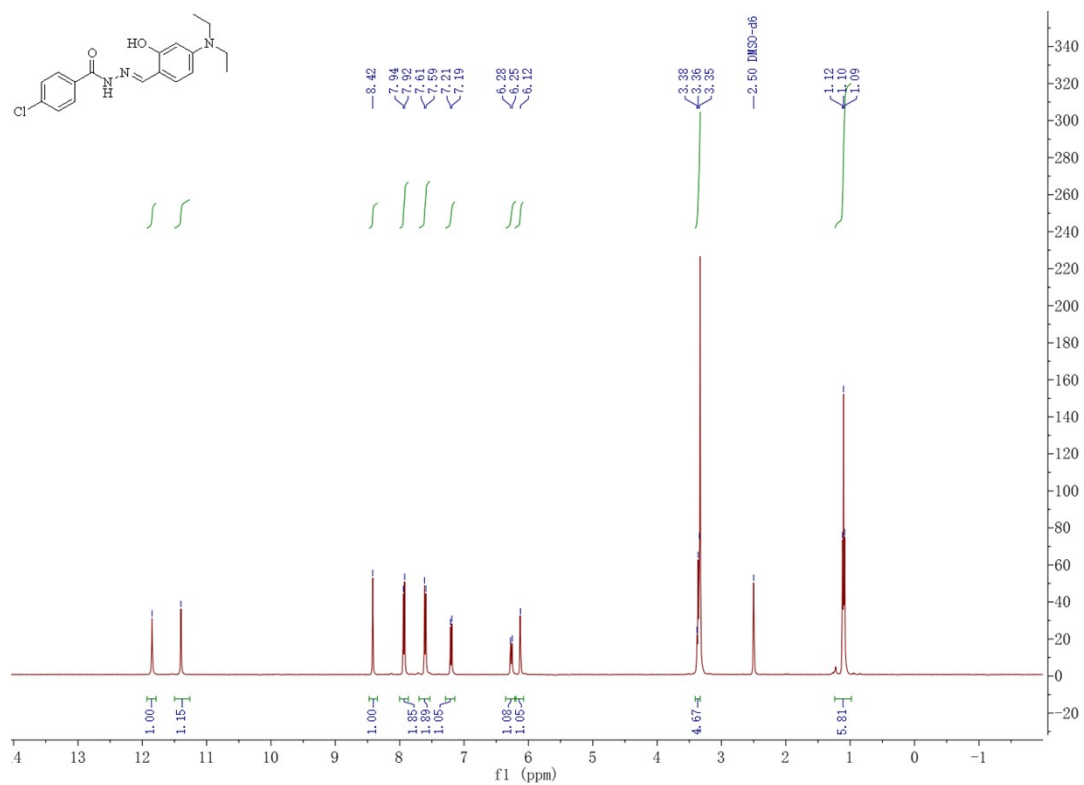

Fig. <sup>1</sup>H NMR of **D4** (400 MHz, DMSO)

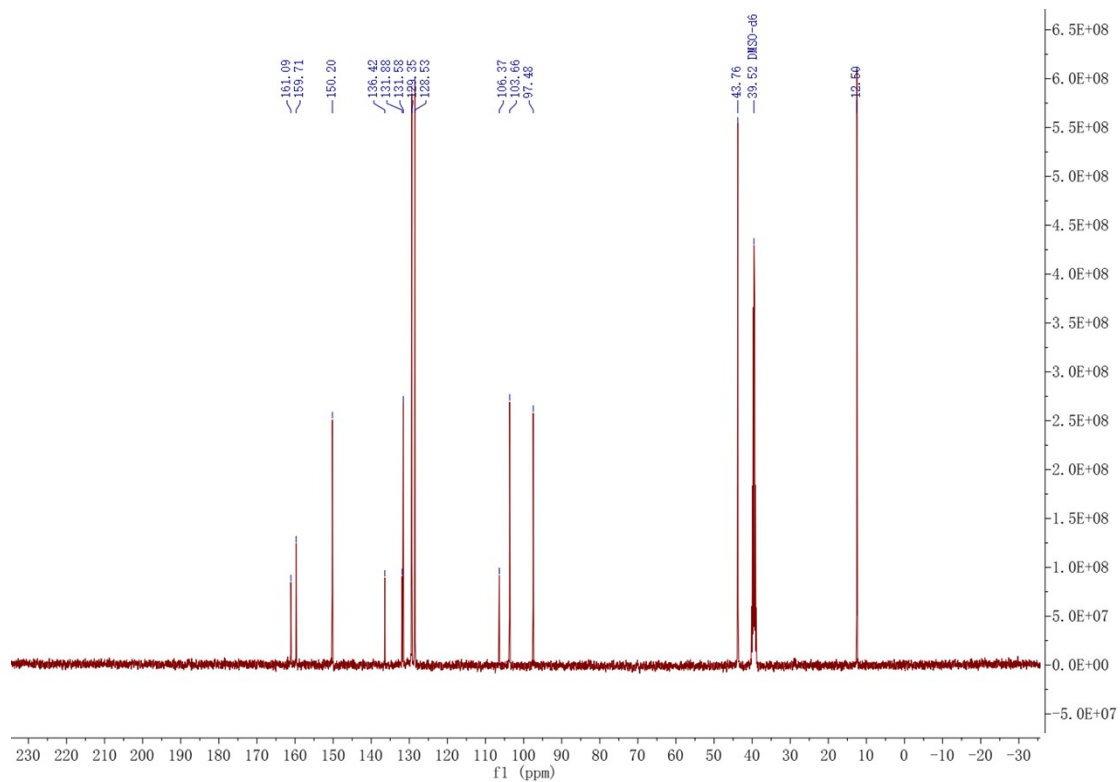

Fig. <sup>13</sup>C NMR of **D4** (100 MHz, DMSO)

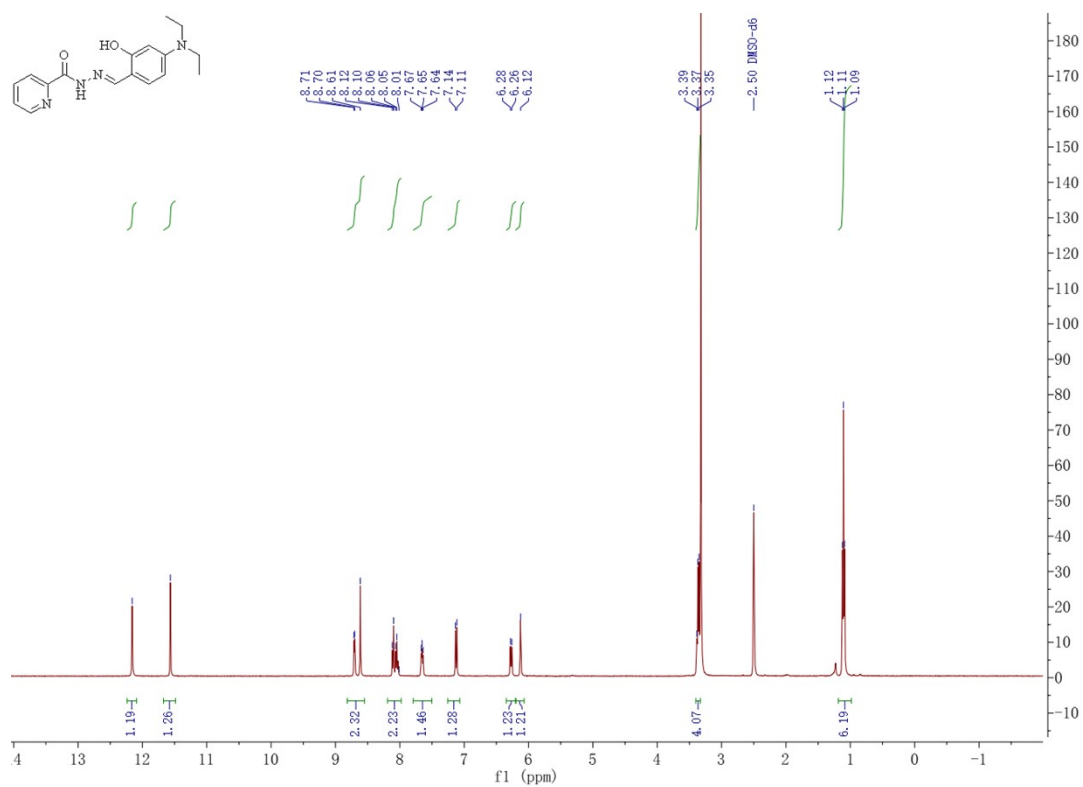

Fig. <sup>1</sup>H NMR of D5 (400 MHz, DMSO)

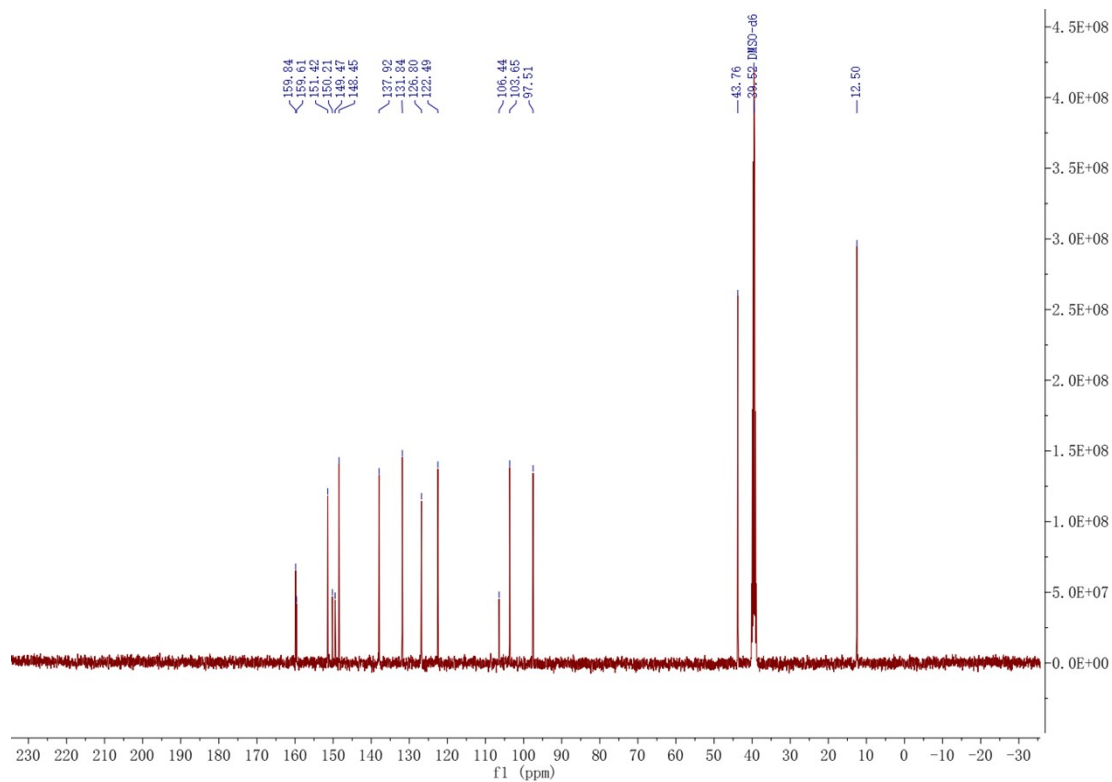

Fig. <sup>13</sup>C NMR of D5 (100 MHz, DMSO)

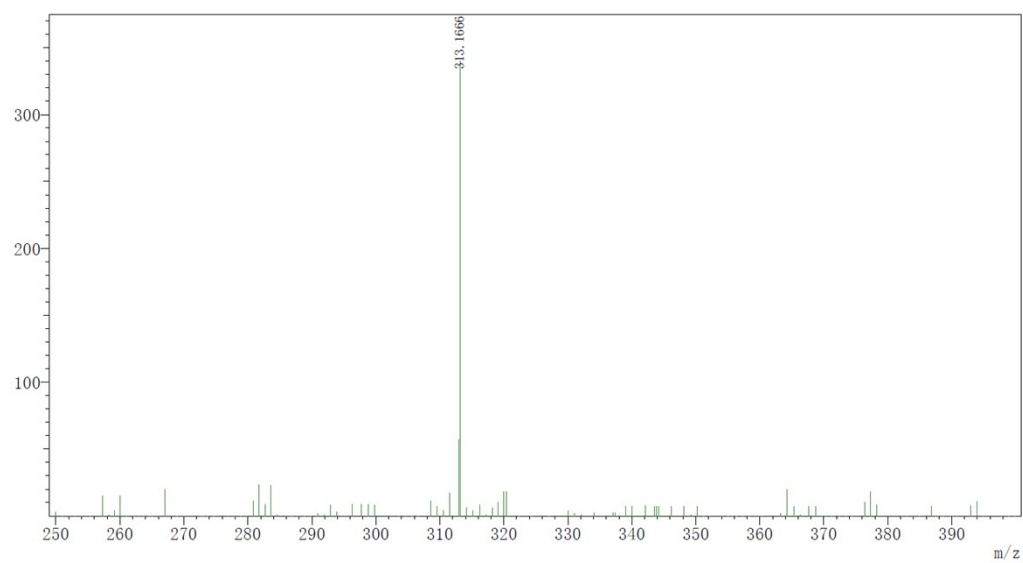

Fig. Mass spectrum of compound **D5**

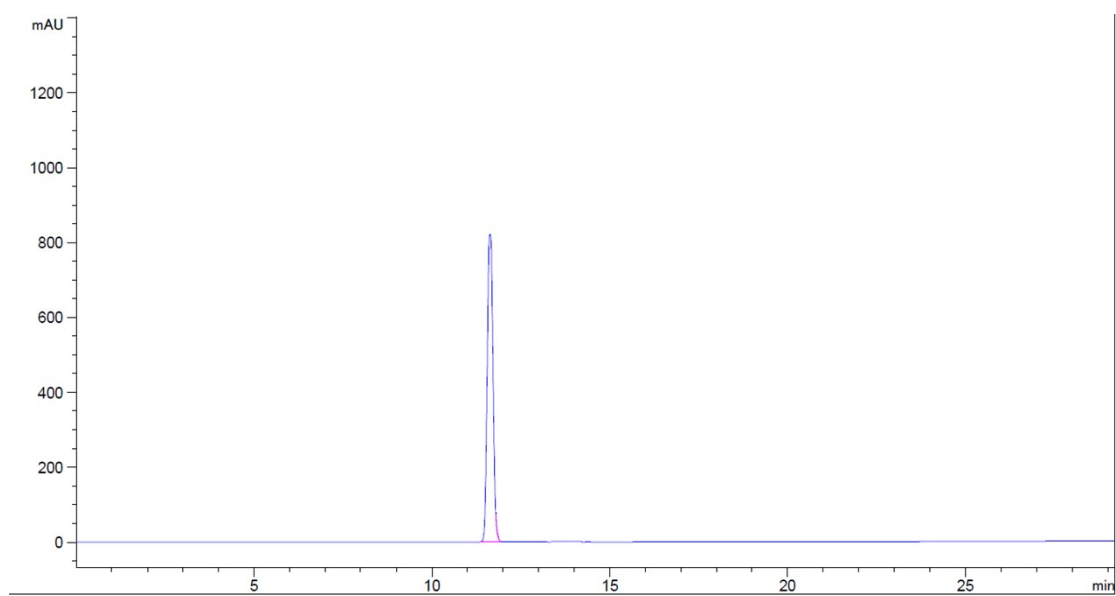

Fig. HPLC chromatograms compound **D5**



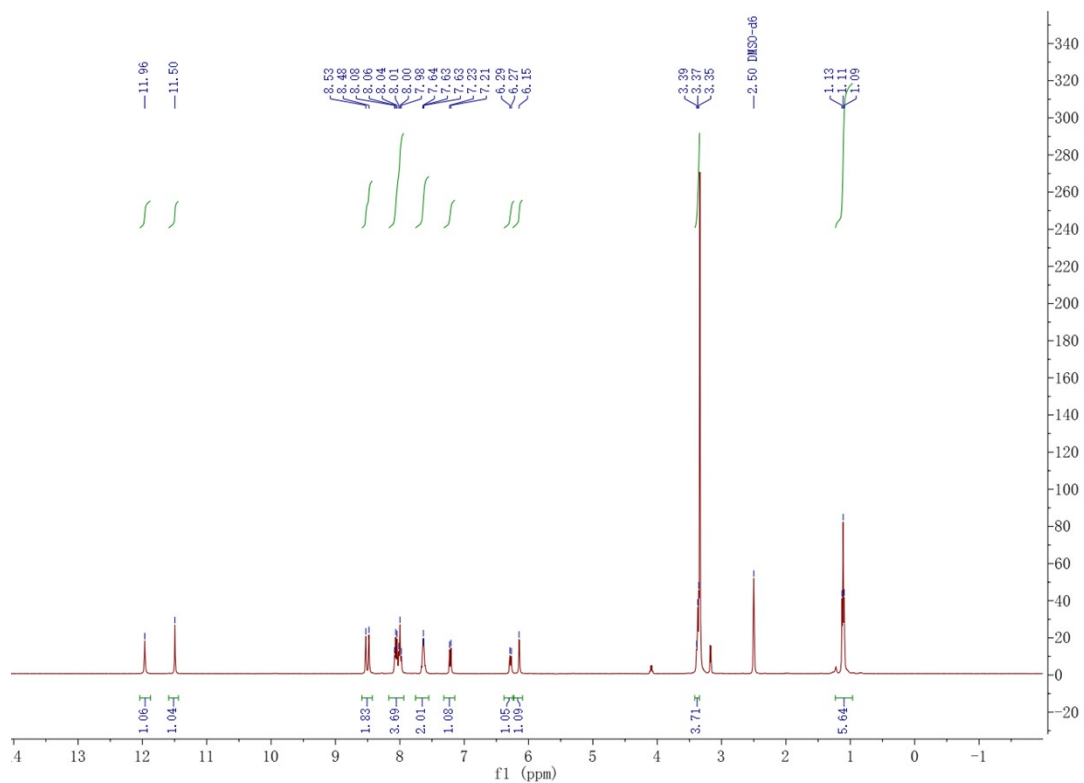

Fig. <sup>1</sup>H NMR of **D6** (400 MHz, DMSO)

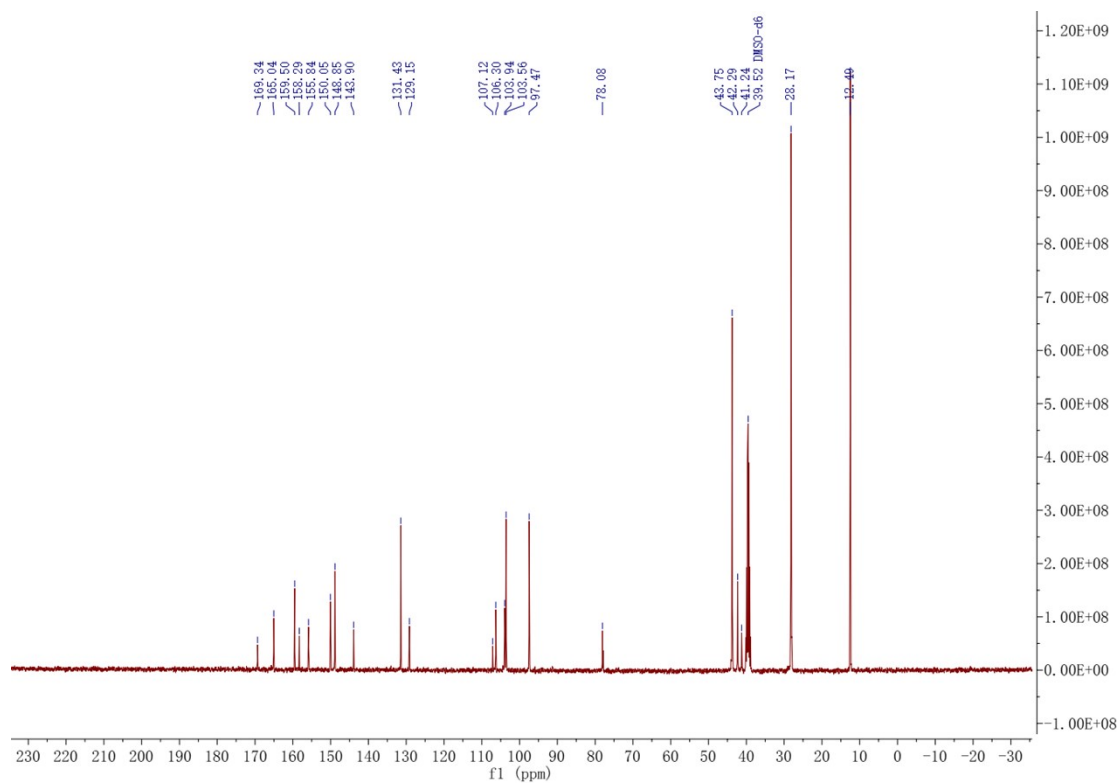

Fig. <sup>13</sup>C NMR of **D6** (100 MHz, DMSO)

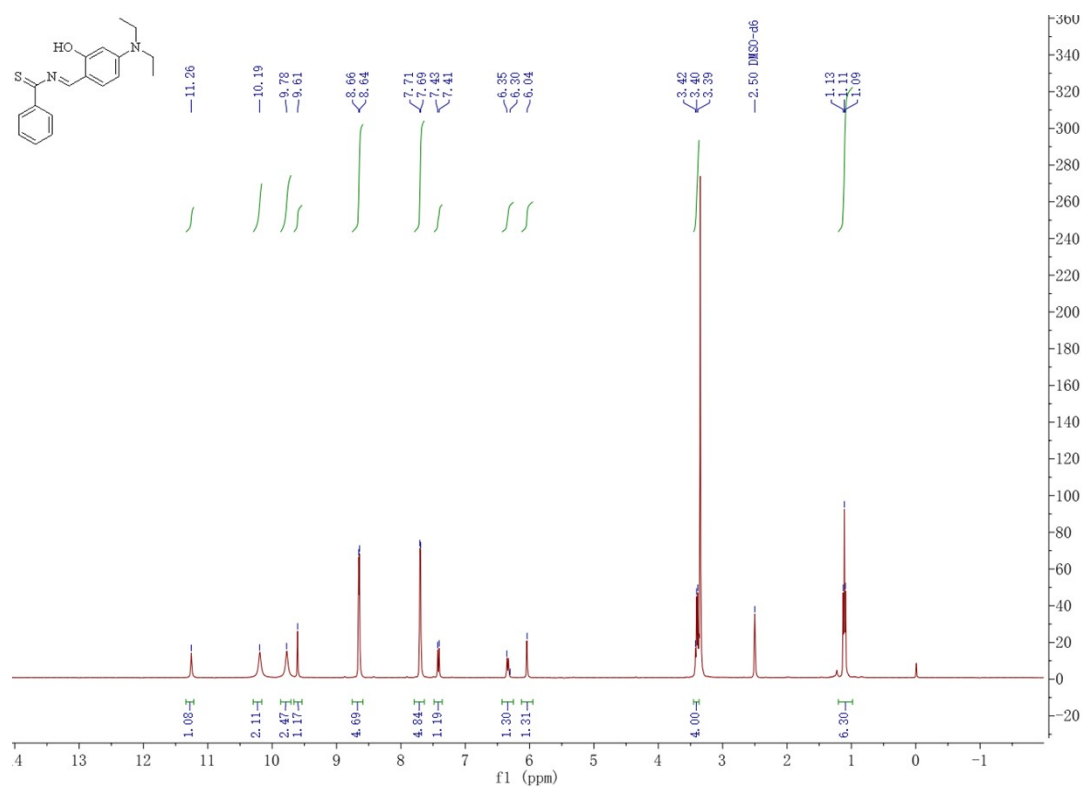

Fig. <sup>1</sup>H NMR of **D7** (400 MHz, DMSO)

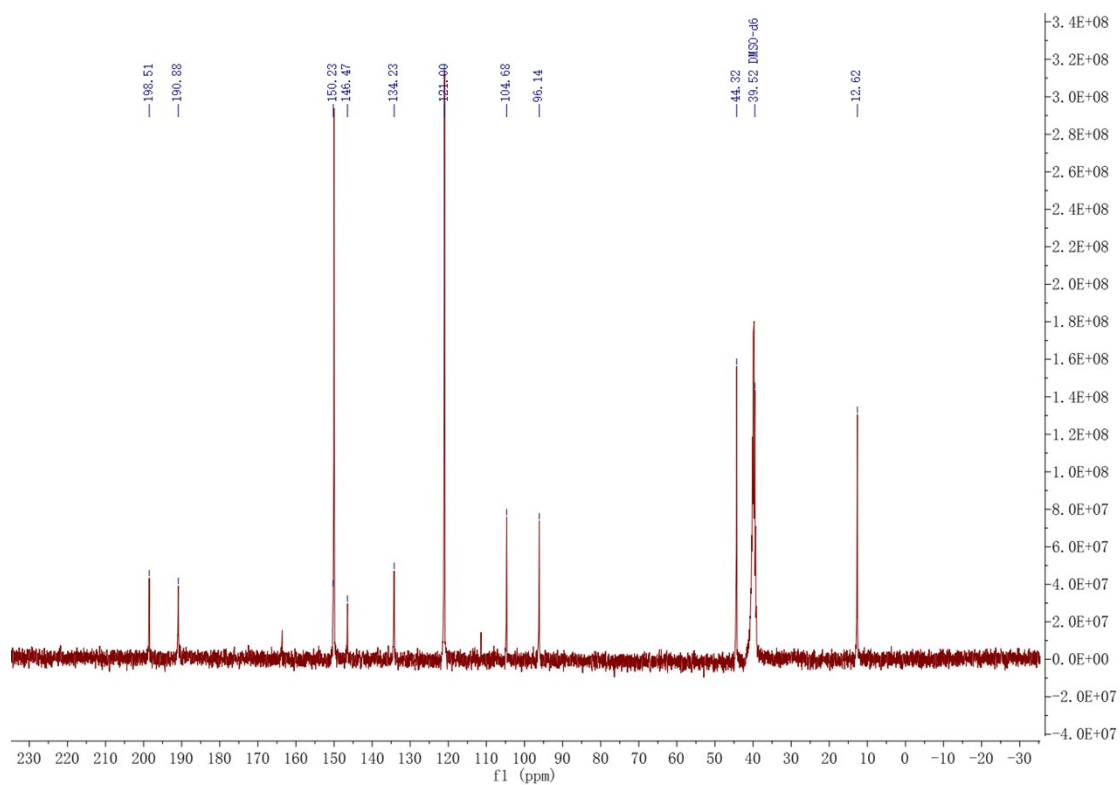

Fig. <sup>13</sup>C NMR of **D7** (100 MHz, DMSO)

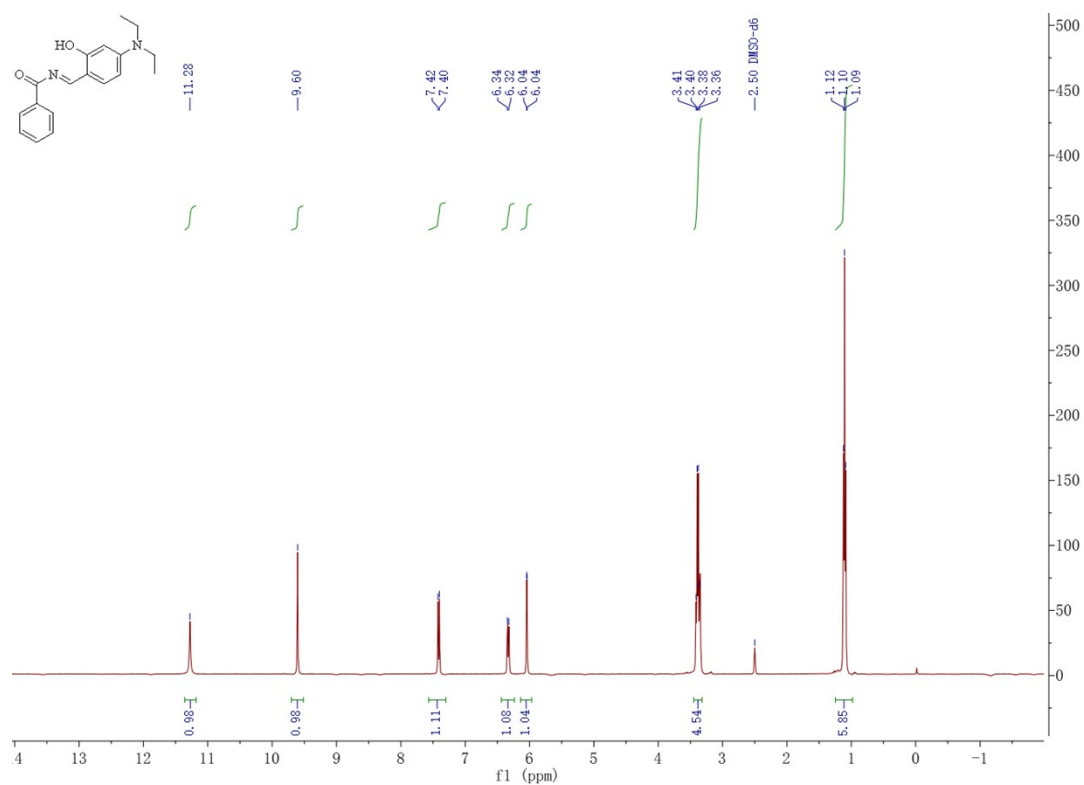

Fig.  $^1\text{H}$  NMR of **D8** (400 MHz, DMSO)

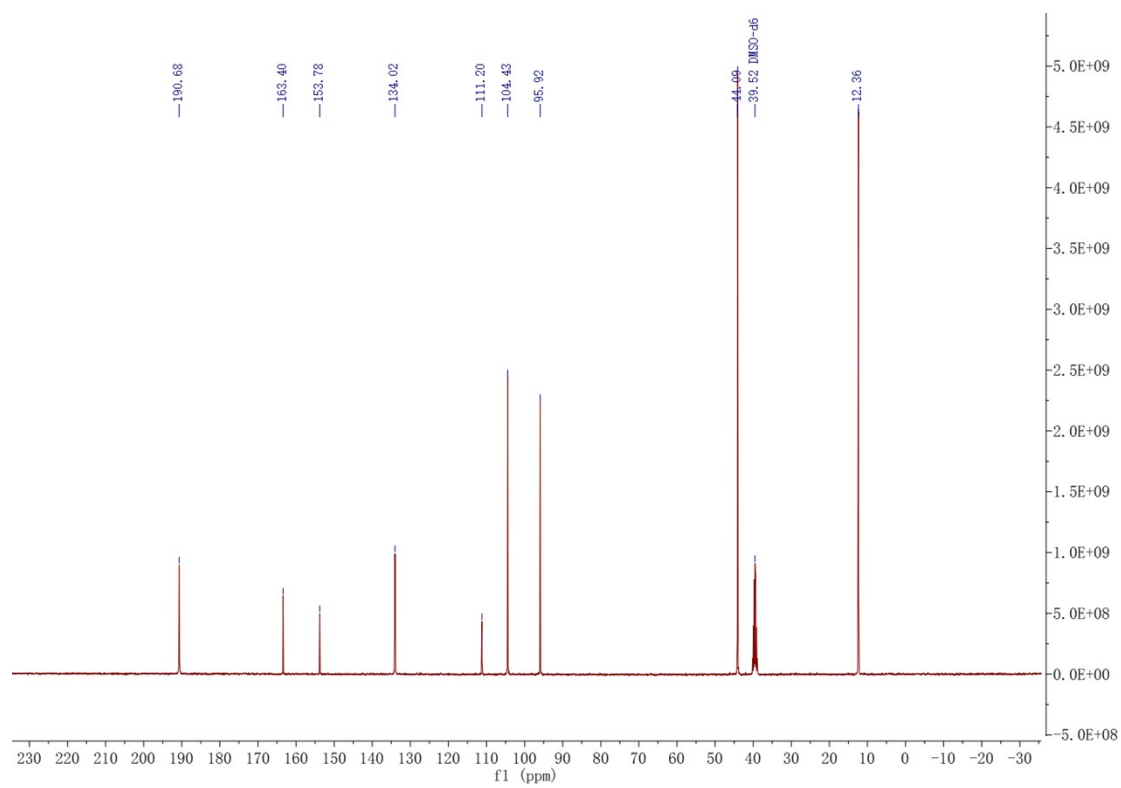

Fig.  $^{13}\text{C}$  NMR of **D8** (100 MHz, DMSO)

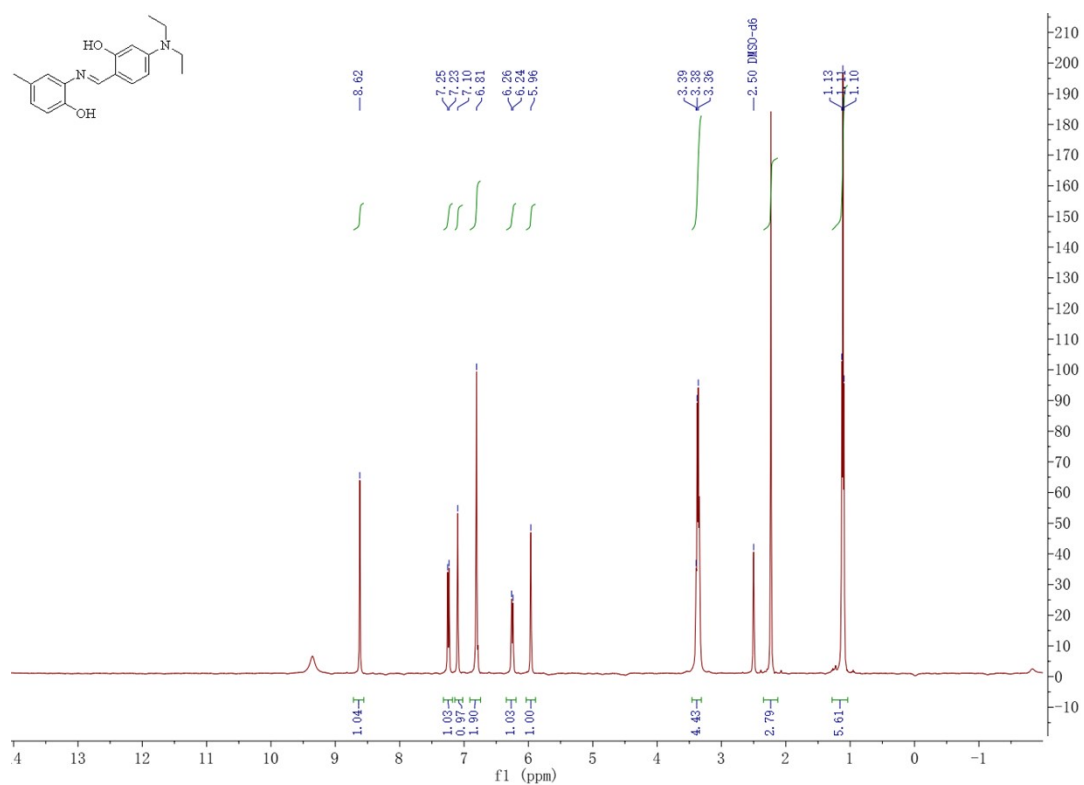

Fig. <sup>1</sup>H NMR of **D9** (400 MHz, DMSO)

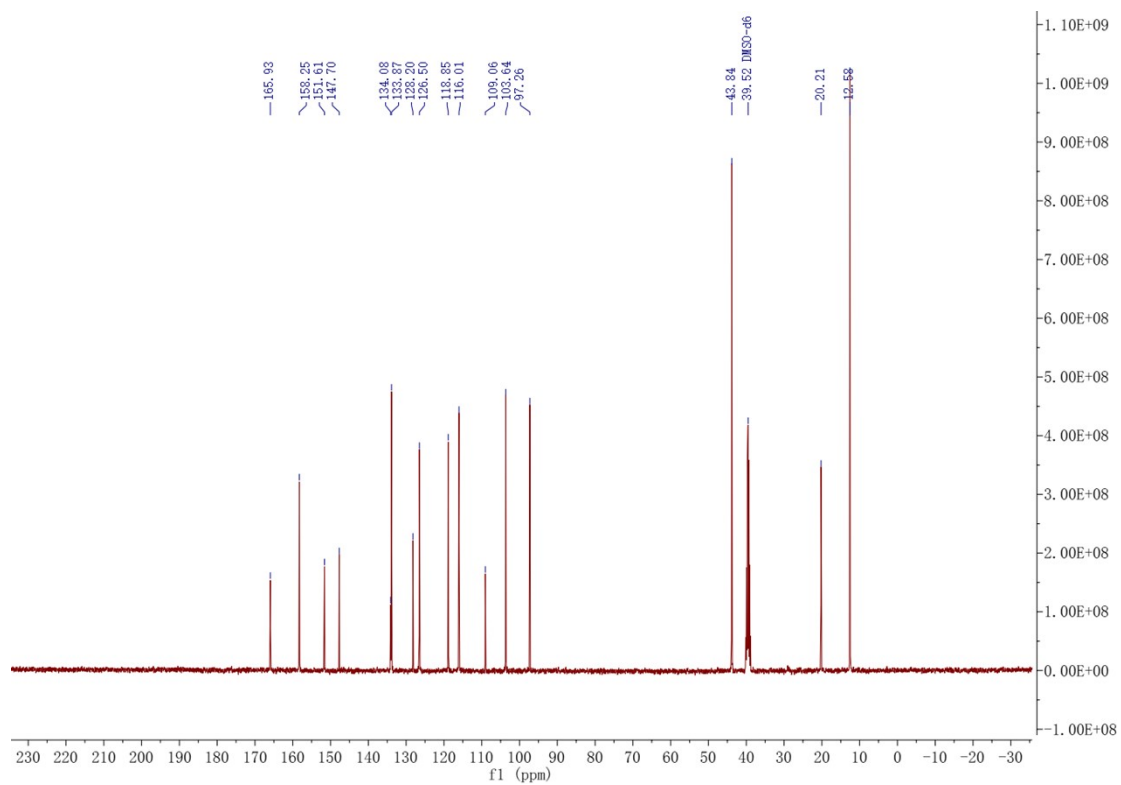

Fig. <sup>13</sup>C NMR of **D9** (100 MHz, DMSO)

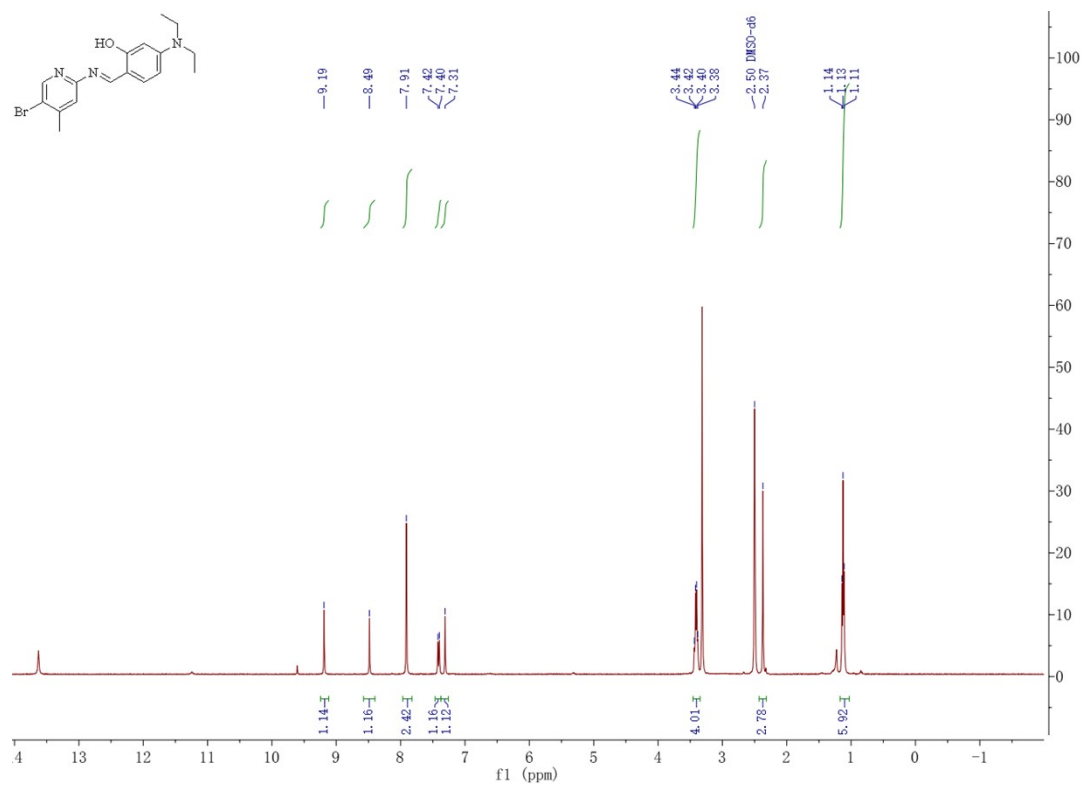

Fig.  $^1\text{H}$  NMR of **D10** (400 MHz, DMSO)

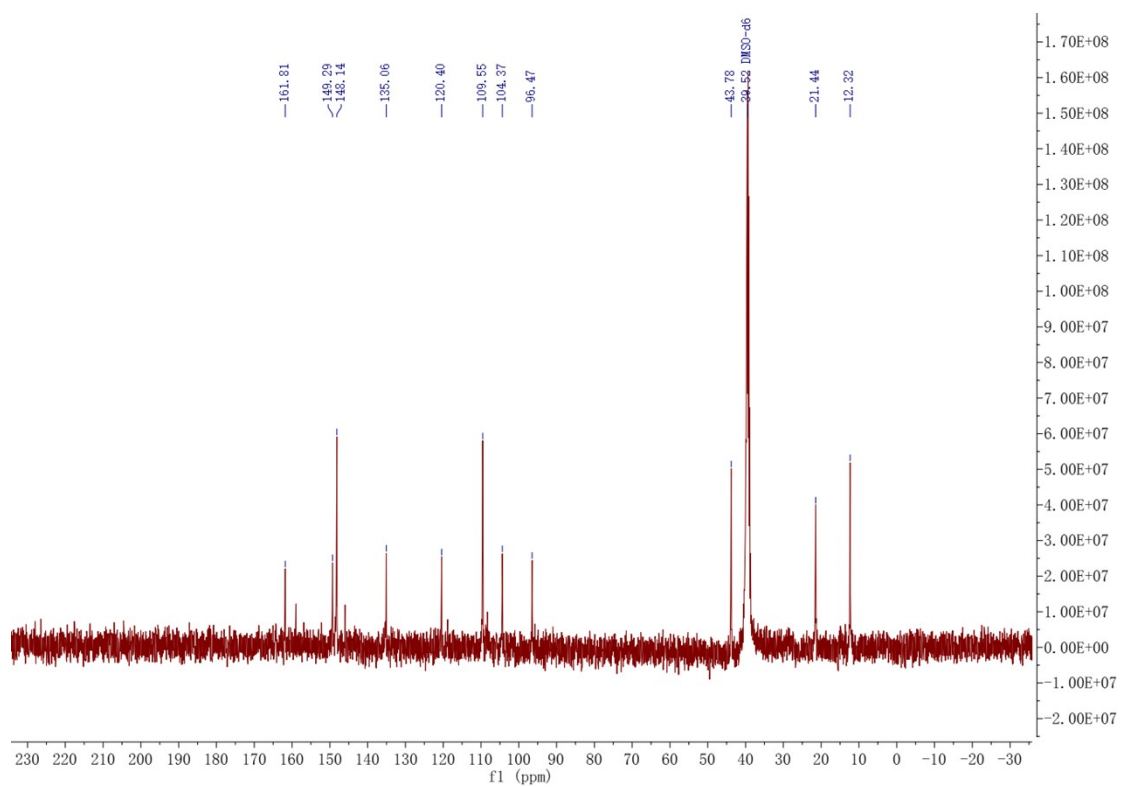

Fig.  $^{13}\text{C}$  NMR of **D10** (100 MHz, DMSO)
